# Supplementary material for: Clinical Effectiveness of Sacubitril/Valsartan Among Patients Hospitalized for Heart Failure With Reduced Ejection Fraction
Source: PubMed Central journal article supplement — J Am Heart Assoc. 2021 Aug 5;10(16):e021459. doi: 10.1161/JAHA.121.021459 (PMC8475054; doi:10.1161/jaha.121.021459), 2021-08-05

# **SUPPLEMENTARY MATERIAL**

| <b>Table S1. Definitions of Study Outcomes</b>         |                                                                                                                              |
|--------------------------------------------------------|------------------------------------------------------------------------------------------------------------------------------|
| <b>Outcome</b>                                         | <b>Definition</b>                                                                                                            |
| All-cause mortality                                    | Presence of a death date during the follow-up period in the CMS beneficiary summary file.                                    |
| All-cause hospitalization                              | Any inpatient claim for post-discharge admission to an acute care hospital.                                                  |
| Heart failure hospitalization                          | Inpatient claim having a primary diagnosis of heart failure (ICD-10-CM diagnosis codes: I098.1, I50.x, I11.0, I13.0, I13.2). |
| Composite of all-cause mortality or HF hospitalization | Mortality and heart failure hospitalization definitions above used to form composite outcome.                                |
| Hospitalization for metabolic/nutritional disorder     | Inpatient claims with Diagnosis-related group (DRG) codes 640, 641                                                           |
| Hospitalization for urinary tract infection            | Inpatient claims with primary diagnosis of ICD-10-CM code N39.0                                                              |

|                                                                                                                                                                                                                                                                                                                                                                                        |
|----------------------------------------------------------------------------------------------------------------------------------------------------------------------------------------------------------------------------------------------------------------------------------------------------------------------------------------------------------------------------------------|
| <b>Table S2: List of Variables Included in the Inverse Probability of Treatment Weighting Model</b>                                                                                                                                                                                                                                                                                    |
| <b>Demographics:</b> age, sex, race, Medicaid dual eligibility, index hospitalization year                                                                                                                                                                                                                                                                                             |
| <b>Vital signs and laboratory data at discharge:</b> systolic blood pressure, heart rate, creatinine, sodium                                                                                                                                                                                                                                                                           |
| <b>Medical history:</b> ejection fraction, ischemic etiology, anemia, atrial fibrillation/flutter, chronic obstructive pulmonary disease, diabetes, hyperlipidemia, hypertension, prior coronary artery bypass grafting surgery, prior percutaneous coronary intervention, chronic kidney disease, smoking in past 12 months, stroke/transient ischemic attack, valvular heart disease |
| <b>Heart failure device therapy:</b> cardiac resynchronization therapy and defibrillator, implantable cardioverter-defibrillator                                                                                                                                                                                                                                                       |
| <b>Hospital characteristics of site of index hospitalization:</b> teaching hospital, profit status, region, hospital bed size, cardiac catheterization lab on site, heart transplantation on site                                                                                                                                                                                      |

**Table S3. Characteristics of Patients Discharged With and Without Sacubitril/Valsartan Before Application of Inverse Probability Weights**

|                                                           | Sacubitril/Valsartan at Discharge |                  | Standardized<br>Mean<br>Difference* |
|-----------------------------------------------------------|-----------------------------------|------------------|-------------------------------------|
|                                                           | Yes<br>(n=1,551)                  | No<br>(n=12,679) |                                     |
| Age (years)                                               | 77 (71-83)                        | 79 (72-86)       | 25.8                                |
| Women                                                     | 560 (36.1)                        | 5,012 (39.5)     | 7.1                                 |
| Race                                                      |                                   |                  | 3.6                                 |
| White                                                     | 1,259 (81.2)                      | 10,272 (81.0)    |                                     |
| Black or African-American                                 | 191 (12.3)                        | 1,480 (11.7)     |                                     |
| Other                                                     | 101 (6.5)                         | 927 (7.3)        |                                     |
| Medicaid dual eligibility                                 | 218 (14.1)                        | 1,927 (15.2)     | 3.2                                 |
| Ejection fraction (%)                                     | 25 (20-32)                        | 28 (23-35)       | 32.2                                |
| Index hospitalization year                                |                                   |                  | 49.9                                |
| 2015/2016                                                 | 294 (19.0)                        | 5,089 (40.1)     |                                     |
| 2017                                                      | 529 (34.1)                        | 3,824 (30.2)     |                                     |
| 2018                                                      | 728 (46.9)                        | 3,766 (29.7)     |                                     |
| <b><u>Vital sign and laboratory data at discharge</u></b> |                                   |                  |                                     |
| Systolic blood pressure (mmHg)                            | 113 (102-126)                     | 118 (107-132)    | 27.1                                |
| Heart rate (beats/min)                                    | 74 (67-83)                        | 75 (67-85)       | 9.5                                 |
| Sodium (mEq/L)                                            | 139 (136-141)                     | 139 (136-141)    | 5.4                                 |
| Creatinine (mg/dL)                                        | 1.2 (1.0-1.5)                     | 1.3 (1.0-1.7)    | 3.5                                 |
| <b><u>Medical history</u></b>                             |                                   |                  |                                     |
| Ischemic HF etiology                                      | 1,105 (71.2)                      | 8,268 (65.2)     | 13.0                                |
| Prior PCI                                                 | 451 (29.1)                        | 3,094 (24.4)     | 10.6                                |
| Prior CABG                                                | 460 (29.7)                        | 3,461 (27.3)     | 5.2                                 |
| Hypertension                                              | 1,329 (85.7)                      | 10,507 (82.9)    | 7.7                                 |
| Hyperlipidemia                                            | 981 (63.2)                        | 7,778 (61.3)     | 3.9                                 |
| Valve disease†                                            | 292 (18.8)                        | 2,400 (18.9)     | 0.3                                 |
| Atrial fibrillation/ flutter                              | 716 (46.2)                        | 5,733 (45.2)     | 1.9                                 |

|                                                   |               |               |      |
|---------------------------------------------------|---------------|---------------|------|
| Diabetes                                          | 667 (43.0)    | 5,233 (41.3)  | 3.5  |
| Stroke/TIA                                        | 256 (16.5)    | 2,248 (17.7)  | 3.3  |
| Chronic kidney disease                            | 239 (15.4)    | 2,401 (18.9)  | 9.4  |
| Anemia                                            | 259 (16.7)    | 2,448 (19.3)  | 6.8  |
| COPD                                              | 451 (29.1)    | 3,867 (30.5)  | 3.1  |
| Smoking in past 12 months                         | 168 (10.8)    | 1,415 (11.2)  | 1.0  |
| <b><u>Device therapy</u></b>                      |               |               |      |
| CRT-D                                             | 332 (21.4)    | 1,374 (10.8)  | 29.0 |
| ICD only                                          | 361 (23.3)    | 1,801 (14.2)  | 23.4 |
| <b><u>Medical therapy prior to admission†</u></b> |               |               |      |
| ACEI/ARB                                          | 287 (18.5)    | 4,081 (32.2)  | 34.2 |
| Sacubitril/valsartan                              | 297 (19.1)    | 31 (0.2)      | 84.5 |
| Beta-blocker                                      | 668 (43.1)    | 5,906 (46.6)  | 31.5 |
| MRA                                               | 185 (11.9)    | 1,157 (9.1)   | 31.2 |
| <b><u>Medical therapy at discharge</u></b>        |               |               |      |
| ACEI/ARB                                          | --            | 7,857 (62.0)  | --   |
| Beta-blocker                                      | 1,437 (92.6)  | 11,113 (87.6) | 16.8 |
| MRA                                               | 604 (38.9)    | 3,437 (27.1)  | 25.4 |
| <b><u>Hospital characteristics</u></b>            |               |               |      |
| Teaching hospital                                 | 1,202 (77.5)  | 10,316 (81.4) | 9.6  |
| Profit status                                     |               |               | 9.8  |
| Not-for-profit                                    | 1,225 (79.0)  | 9,501 (74.9)  |      |
| Government                                        | 222 (14.3)    | 2,101 (16.6)  |      |
| For profit                                        | 104 (6.7)     | 1,077 (8.5)   |      |
| Region                                            |               |               | 32.2 |
| Northeast                                         | 411 (26.5)    | 3,427 (27.0)  |      |
| Midwest                                           | 299 (19.3)    | 2,747 (21.7)  |      |
| South                                             | 716 (46.2)    | 4,352 (34.3)  |      |
| West                                              | 125 (8.1)     | 2,153 (17.0)  |      |
| Hospital bed size                                 | 393 (259-564) | 370 (253-557) |      |
| Cardiac catheterization lab on site               | 1,416 (91.3)  | 11,818 (93.2) | 7.2  |

|                               |          |           |      |
|-------------------------------|----------|-----------|------|
| Heart transplantation on site | 50 (3.2) | 694 (5.5) | 11.0 |
|-------------------------------|----------|-----------|------|

---

Data presented as n (%) or median (25<sup>th</sup> - 75<sup>th</sup>).

\* Standardized mean differences represents differences in means or proportions divided by the standard error and multiplied by 100. Standardized mean differences greater than 10 indicate imbalance between groups.

† Moderately severe or severe disease of any valve, with exception of functional (i.e., secondary) mitral regurgitation.

‡ Data were missing for 718 patients in the sacubitril/valsartan group and 4,272 patients in the no sacubitril/valsartan group. Percentages reflect patients receiving medication among total patients in the group.

Abbreviations: ACEI, angiotensin-converting enzyme inhibitor; ARB, angiotensin II receptor blocker; ARNI, angiotensin receptor-neprilysin inhibitor; CABG, coronary artery bypass grafting; COPD, chronic obstructive pulmonary disease; CRT-D, cardiac resynchronization therapy and defibrillator; HF, heart failure; ICD, implantable cardioverter-defibrillator; MRA, mineralocorticoid receptor antagonist; PCI, percutaneous coronary intervention; TIA, transient ischemic attack

**Table S4. Characteristics of Patients Discharged With and Without Sacubitril/Valsartan After Application of Inverse Probability Weights**

|                                                           | Sacubitril/Valsartan at Discharge |                  | Standardized<br>Mean<br>Difference* |
|-----------------------------------------------------------|-----------------------------------|------------------|-------------------------------------|
|                                                           | Yes<br>(n=1,551)                  | No<br>(n=12,679) |                                     |
| Age (years)                                               | 78 (72-84)                        | 79 (72-86)       | 0.9                                 |
| Women                                                     | 601 (38.7)                        | 4,964 (39.2)     | 1.9                                 |
| Race                                                      |                                   |                  | 2.5                                 |
| White                                                     | 1,239 (80.5)                      | 10,275 (81.0)    |                                     |
| Black or African-American                                 | 179 (11.6)                        | 1,491 (11.8)     |                                     |
| Other                                                     | 121 (7.9)                         | 915 (7.2)        |                                     |
| Medicaid dual eligibility                                 | 248 (16.1)                        | 1,913 (15.1)     | 2.9                                 |
| Ejection fraction (%)                                     | 28 (20-33)                        | 28 (21-35)       | 8.0                                 |
| Index hospitalization year                                |                                   |                  | 3.1                                 |
| 2015/2016                                                 | 559 (36.3)                        | 4,795 (37.8)     |                                     |
| 2017                                                      | 3,881 (30.6)                      | 486 (31.5)       |                                     |
| 2018                                                      | 494 (32.1)                        | 4,006 (31.6)     |                                     |
| <b><u>Vital sign and laboratory data at discharge</u></b> |                                   |                  |                                     |
| Systolic blood pressure (mmHg)                            | 117 (106-130)                     | 118 (106-131)    | 3.3                                 |
| Heart rate (beats/min)                                    | 75 (68-84)                        | 75 (67-85)       | 0.0                                 |
| Sodium (mEq/L)                                            | 139 (136-141)                     | 139 (136-141)    | 0.4                                 |
| Creatinine (mg/dL)                                        | 1.3 (1.0-1.6)                     | 1.3 (1.0-1.7)    | 1.2                                 |
| <b><u>Medical history</u></b>                             |                                   |                  |                                     |
| Ischemic HF etiology                                      | 1,028 (66.8)                      | 8,357 (65.9)     | 1.9                                 |
| Prior PCI                                                 | 403 (26.2)                        | 3,161 (24.9)     | 2.8                                 |
| Prior CABG                                                | 460 (29.9)                        | 3,499 (27.6)     | 5.1                                 |
| Hypertension                                              | 1,255 (81.6)                      | 10,547 (83.2)    | 4.2                                 |
| Hyperlipidemia                                            | 932 (60.5)                        | 7,805 (61.5)     | 2.1                                 |
| Valve disease †                                           | 284 (18.4)                        | 2,396 (18.9)     | 1.2                                 |
| Atrial fibrillation/ flutter                              | 694 (45.1)                        | 5,744 (45.3)     | 0.4                                 |

|                                             |               |               |      |
|---------------------------------------------|---------------|---------------|------|
| Diabetes                                    | 663 (43.1)    | 5,261 (41.5)  | 3.3  |
| Stroke/TIA                                  | 281 (18.3)    | 2,235 (17.6)  | 1.7  |
| Chronic kidney disease                      | 316 (20.5)    | 2,358 (18.6)  | 4.9  |
| Anemia                                      | 292 (18.9)    | 2,411 (19.0)  | 0.2  |
| COPD                                        | 465 (30.2)    | 3,847 (30.3)  | 0.3  |
| Smoking in past 12 months                   | 163 (10.6)    | 1,409 (11.1)  | 1.7  |
| <b><u>Device therapy</u></b>                |               |               |      |
| CRT-D                                       | 191 (12.4)    | 1,525 (12.0)  | 1.2  |
| ICD only                                    | 223 (14.5)    | 1,929 (15.2)  | 2.0  |
| <b><u>Medical therapy at discharge†</u></b> |               |               |      |
| ACEI/ARB                                    | --            | 7,875 (62.1)  | --   |
| Beta-blocker                                | 1,420 (92.3)  | 11,130 (87.8) | 15.1 |
| MRA                                         | 534 (34.7)    | 3,494 (27.6)  | 15.5 |
| <b><u>Hospital characteristics</u></b>      |               |               |      |
| Teaching hospital                           | 1,255 (81.6)  | 10,270 (81.0) | 1.5  |
| Profit status                               |               |               | 1.0  |
| Not-for-profit                              | 1,154 (75.0)  | 9,557 (75.4)  |      |
| Government                                  | 253 (16.5)    | 2,071 (16.3)  |      |
| For profit                                  | 132 (8.5)     | 1,053 (8.3)   |      |
| Region                                      |               |               | 4.1  |
| Northeast                                   | 395 (25.7)    | 3,418 (27.0)  |      |
| Midwest                                     | 339 (22.0)    | 2,716 (21.4)  |      |
| South                                       | 540 (35.1)    | 4,516 (35.6)  |      |
| West                                        | 265 (17.2)    | 2,031 (16.0)  |      |
| Hospital bed size                           | 393 (286-581) | 370 (253-557) |      |
| Cardiac catheterization lab on site         | 1,451 (94.3)  | 11,795 (93.0) |      |
| Heart transplantation on site               | 84 (5.5)      | 662 (5.2)     |      |

---

Data presented as percentages or median (25<sup>th</sup> - 75<sup>th</sup>).



\*Standardized mean differences represents differences in means or proportions divided by the standard error and multiplied by 100. Standardized mean differences greater than 10 indicate imbalance between groups.

† Moderately severe or severe regurgitation or stenosis of any valve, with exception of functional (i.e., secondary) mitral regurgitation.

‡ Discharge medications were not included within inverse probability of treatment weighted models and are not expected to be balanced. Adjustment for beta-blocker and mineralocorticoid receptor antagonist (MRA) therapy at discharge was added to inverse probability of treatment weighted models to constitute the fully adjusted model.

Abbreviations: ACEI, angiotensin-converting enzyme inhibitor; ARB, angiotensin II receptor blocker; ARNI, angiotensin receptor-neprilysin inhibitor; CABG, coronary artery bypass grafting; COPD, chronic obstructive pulmonary disease; CRT-D, cardiac resynchronization therapy and defibrillator; HF, heart failure; ICD, implantable cardioverter-defibrillator; MRA, mineralocorticoid receptor antagonist; PCI, percutaneous coronary intervention; TIA, transient ischemic attack

**Table S5. Characteristics of Patients Discharged with neither Sacubitril/Valsartan nor ACEI/ARB versus ACEI/ARB versus Sacubitril/Valsartan Without Application of Inverse Probability Weights**

|                                                           | Standardized Mean Differences*                               |                       |                                       |                                                                          |                                                                 |                                      |
|-----------------------------------------------------------|--------------------------------------------------------------|-----------------------|---------------------------------------|--------------------------------------------------------------------------|-----------------------------------------------------------------|--------------------------------------|
|                                                           | Neither ACEI/ARB<br>nor<br>Sacubitril/Valsartan<br>(n=4,822) | ACEI/ARB<br>(n=7,857) | Sacubitril/<br>Valsartan<br>(n=1,551) | Neither ACEI/ARB nor<br>Sacubitril/Valsartan vs.<br>Sacubitril/Valsartan | Neither ACEI/ARB<br>nor<br>Sacubitril/Valsartan<br>vs. ACEI/ARB | ACEI/ARB vs.<br>Sacubitril/Valsartan |
| Age (years)                                               | 81 (73-87)                                                   | 78 (71-85)            | 77 (71-83)                            | 39.7                                                                     | 21.3                                                            | 17.4                                 |
| Women                                                     | 1,750 (36.3)                                                 | 3,262 (41.5)          | 560 (36.1)                            | 0.4                                                                      | 10.7                                                            | 11.1                                 |
| Race                                                      |                                                              |                       |                                       | 5.3                                                                      | 5.6                                                             | 3.9                                  |
| White                                                     | 3,970 (82.3)                                                 | 6,302 (80.2)          | 1,259 (81.2)                          |                                                                          |                                                                 |                                      |
| Black or African American                                 | 515 (10.7)                                                   | 965 (12.3)            | 191 (12.3)                            |                                                                          |                                                                 |                                      |
| Other                                                     | 337 (7.0)                                                    | 590 (7.5)             | 101 (6.5)                             |                                                                          |                                                                 |                                      |
| Medicaid dual eligibility                                 | 697 (14.5)                                                   | 1,230 (15.7)          | 218 (14.1)                            | 1.1                                                                      | 3.4                                                             | 4.5                                  |
| Ejection fraction (%)                                     | 30 (23-35)                                                   | 28 (22-35)            | 25 (20-32)                            | 37.8                                                                     | 9.5                                                             | 28.7                                 |
| Index hospitalization year                                |                                                              |                       |                                       | 47.4                                                                     | 5.9                                                             | 51.5                                 |
| 2015/2016                                                 | 1,899 (39.4)                                                 | 3,190 (40.6)          | 294 (19.0)                            |                                                                          |                                                                 |                                      |
| 2017                                                      | 1,411 (29.3)                                                 | 2,413 (30.7)          | 529 (34.1)                            |                                                                          |                                                                 |                                      |
| 2018                                                      | 1,512 (31.)                                                  | 2,254 (28.)           | 728 (46.9)                            |                                                                          |                                                                 |                                      |
| <b><u>Vital sign and laboratory data at discharge</u></b> |                                                              |                       |                                       |                                                                          |                                                                 |                                      |
| Systolic blood pressure<br>(mmHg)                         | 118 (105-130.0)                                              | 118 (107-132)         | 113 (102-126)                         | 21.4                                                                     | 8.8                                                             | 30.7                                 |
| Heart rate (beats/min)                                    | 76 (68-86)                                                   | 75 (67-84)            | 74 (67-83)                            | 17.3                                                                     | 12.5                                                            | 4.5                                  |
| Sodium (mEq/L)                                            | 138 (136-141)                                                | 139 (136-141)         | 139 (136-141)                         | 4.3                                                                      | 2.6                                                             | 6.0                                  |
| Creatinine (mg/dL)                                        | 1.6 (1.2-2.1)                                                | 1.2 (0.9-1.5)         | 1.2 (1.0-1.5)                         | 13.0                                                                     | 22.1                                                            | 3.5                                  |
| <b><u>Medical history</u></b>                             |                                                              |                       |                                       |                                                                          |                                                                 |                                      |
| Ischemic HF etiology                                      | 3,311 (68.7)                                                 | 4,957 (63.1)          | 1,105 (71.2)                          | 5.6                                                                      | 11.8                                                            | 17.4                                 |
| Prior PCI                                                 | 1,211 (25.1)                                                 | 1,883 (24.0)          | 451 (29.1)                            | 8.9                                                                      | 2.7                                                             | 11.6                                 |
| Prior CABG                                                | 1,454 (30.2)                                                 | 2,007 (25.5)          | 460 (29.7)                            | 1.1                                                                      | 10.3                                                            | 9.2                                  |

|                                            |               |               |                 |      |      |      |
|--------------------------------------------|---------------|---------------|-----------------|------|------|------|
| Hypertension                               | 3,913 (81.1)  | 6,594 (83.9)  | 1,329 (85.7)    | 12.2 | 7.3  | 4.9  |
| Hyperlipidemia                             | 3,009 (62.4)  | 4,769 (60.7)  | 981 (63.2)      | 1.8  | 3.5  | 5.3  |
| Valve disease †                            | 1,036 (21.5)  | 1,364 (17.4)  | 292 (18.8)      | 6.6  | 10.4 | 3.8  |
| Atrial fibrillation/ flutter               | 2,420 (50.2)  | 3,313 (42.2)  | 716 (46.2)      | 8.1  | 16.1 | 8.1  |
| Diabetes                                   | 1,996 (41.4)  | 3,237 (41.2)  | 667 (43.0)      | 3.3  | 0.4  | 3.7  |
| Stroke/TIA                                 | 944 (19.6)    | 1,304 (16.6)  | 256 (16.5)      | 8.0  | 7.7  | 0.2  |
| Chronic kidney disease                     | 1,408 (29.2)  | 993 (12.6)    | 239 (15.4)      | 33.6 | 41.6 | 8.0  |
| Anemia                                     | 1,155 (24.0)  | 1,293 (16.5)  | 259 (16.7)      | 18.1 | 18.8 | 0.7  |
| COPD                                       | 1,539 (31.9)  | 2,328 (29.6)  | 451 (29.1)      | 6.2  | 5.0  | 1.2  |
| Smoking in past 12 months                  | 442 (9.2)     | 973 (12.4)    | 168 (10.8)      | 5.6  | 10.4 | 4.8  |
| <b><u>Device therapy</u></b>               |               |               |                 |      |      |      |
| CRT-D                                      | 565 (11.7)    | 809 (10.3)    | 332 (21.4)      | 26.3 | 4.5  | 30.8 |
| ICD only                                   | 737 (15.3)    | 1,064 (13.5)  | 361 (23.3)      | 20.4 | 5.0  | 25.3 |
| <b><u>Medical therapy at discharge</u></b> |               |               |                 |      |      |      |
| Beta-blocker                               | 3,819 (79.2)  | 7,294 (92.8)  | 1,437 (92.6)    | 39.4 | 40.1 | 0.7  |
| MRA                                        | 804 (16.7)    | 2,633 (33.5)  | 604 (38.9)      | 51.3 | 39.6 | 11.3 |
| <b><u>Hospital characteristics</u></b>     |               |               |                 |      |      |      |
| Teaching hospital                          | 3,901 (80.9)  | 6,415 (81.6)  | 1,202 (77.5)    | 8.4  | 1.9  | 10.3 |
| Profit status                              |               |               |                 | 9.9  | 5.7  | 10.3 |
| Not-for-profit                             | 3,638 (75.4)  | 5,863 (74.6)  | 1,225 (79.0)    |      |      |      |
| Government                                 | 745 (15.5)    | 1,356 (17.3)  | 222 (14.3)      |      |      |      |
| For profit                                 | 439 (9.1)     | 638 (8.1)     | 104 (6.7)       |      |      |      |
| Region                                     |               |               |                 | 31.1 | 9.7  | 33.4 |
| Northeast                                  | 1,399 (29.0)  | 2,028 (25.8)  | 411 (26.5)      |      |      |      |
| Midwest                                    | 944 (19.6)    | 1,803 (22.9)  | 299 (19.3)      |      |      |      |
| South                                      | 1,675 (34.7)  | 2,677 (34.1)  | 716 (46.2)      |      |      |      |
| West                                       | 804 (16.7)    | 1,349 (17.2)  | 125 (8.1)       |      |      |      |
| Hospital bed size                          | 366 (253-540) | 376 (253-564) | 393.0 (259-564) | 0.4  | 2.9  | 2.5  |

|                                     |              |              |              |     |     |      |
|-------------------------------------|--------------|--------------|--------------|-----|-----|------|
| Cardiac catheterization lab on site | 4,470 (92.7) | 7,348 (93.5) | 1,416 (91.3) | 5.2 | 3.2 | 8.4  |
| Heart transplantation on site       | 220 (4.6)    | 474 (6.0)    | 50 (3.2)     | 6.9 | 6.6 | 13.4 |

---

Data presented as percentages or median (25<sup>th</sup> - 75<sup>th</sup>)

\*Standardized mean differences represents differences in means or proportions divided by the standard error and multiplied by 100. Standardized mean differences greater than 10 indicate imbalance between groups.

† Moderately severe or severe regurgitation or stenosis of any valve, with exception of functional (i.e., secondary) mitral regurgitation.

Abbreviations: ACEI, angiotensin-converting enzyme inhibitor; ARB, angiotensin II receptor blocker; ARNI, angiotensin receptor-neprilysin inhibitor; CABG, coronary artery bypass grafting; COPD, chronic obstructive pulmonary disease; CRT-D, cardiac resynchronization therapy and defibrillator; HF, heart failure; ICD, implantable cardioverter-defibrillator; MRA, mineralocorticoid receptor antagonist; PCI, percutaneous coronary intervention; TIA, transient ischemic attack

**Table S6. Unadjusted Cumulative Incidence of Clinical Outcomes For Patients Discharged With and Without Sacubitril/Valsartan**

|                                                             | Sacubitril/Valsartan at Discharge |                  | P value |
|-------------------------------------------------------------|-----------------------------------|------------------|---------|
|                                                             | Yes<br>(n=1,551)                  | No<br>(n=12,679) |         |
| <b><u>Effectiveness Endpoints</u></b>                       |                                   |                  |         |
| All-cause mortality                                         |                                   |                  |         |
| 30 days                                                     | 75 (4.9)                          | 1,218 (9.6)      | <0.001  |
| 12 months                                                   | 444 (29.5)                        | 4,870 (39.2)     | <0.001  |
| All-cause hospitalization                                   |                                   |                  |         |
| 30 days                                                     | 356 (23.0)                        | 3,126 (24.7)     | 0.16    |
| 12 months                                                   | 984 (64.7)                        | 7,949 (63.6)     | 0.87    |
| All-cause mortality or HF hospitalization                   |                                   |                  |         |
| 30 days                                                     | 195 (12.6)                        | 2,386 (18.9)     | <0.001  |
| 12 months                                                   | 792 (52.3)                        | 7,215 (57.9)     | <0.001  |
| HF hospitalization                                          |                                   |                  |         |
| 30 days                                                     | 142 (9.2)                         | 1,307 (10.3)     | 0.16    |
| 12 months                                                   | 560 (37.0)                        | 4,167 (33.4)     | 0.02    |
| <b><u>Falsification (Negative Control) Endpoints</u></b>    |                                   |                  |         |
| Metabolic/nutritional hospitalization<br>within 12 months   | 36 (2.4)                          | 236 (1.9)        | 0.20    |
| Urinary tract infection<br>hospitalization within 12 months | 17 (1.1)                          | 183 (1.5)        | 0.28    |

Data presented as n (%). Cumulative incidence of mortality and mortality or HF hospitalization endpoints were calculated using the Kaplan-Meier method and group differences were evaluated using log-rank tests. Cumulative incidence for hospitalization outcomes was estimated using the cumulative incidence function to account for the competing risk of mortality, and group differences were evaluated using Gray tests.

Abbreviations: HF, heart failure

**Table S7. Associations Between Sacubitril/Valsartan Prescription and Clinical Outcomes at 12 Months  
(Referent = No Sacubitril/Valsartan Prescription)**

|                                                          | <b>Unweighted</b>           | <b>Inverse-Weighted*</b>    | <b>Inverse-Weighted +<br/>Adjusted for Discharge<br/>Medications†</b> |
|----------------------------------------------------------|-----------------------------|-----------------------------|-----------------------------------------------------------------------|
|                                                          | <b>HR (95% CI), p value</b> | <b>HR (95% CI), p value</b> | <b>HR (95% CI), p value</b>                                           |
| <b><u>Clinical Endpoints</u></b>                         |                             |                             |                                                                       |
| All-cause mortality                                      | 0.69 (0.62-0.75), p<0.001   | 0.66 (0.58-0.75), p<0.001   | 0.69 (0.60-0.79), p<0.001                                             |
| All-cause hospitalization                                | 0.92 (0.85-0.99), p=0.03    | 0.88 (0.81-0.97), p=0.008   | 0.90 (0.82-0.98), p=0.02                                              |
| All-cause mortality or HF hospitalization                | 0.83 (0.77-0.90), p<0.001   | 0.80 (0.72-0.89), p<0.001   | 0.83 (0.74-0.92), p<0.001                                             |
| HF hospitalization                                       | 1.02 (0.91-1.13), p=0.76    | 0.92 (0.80-1.07), p=0.28    | 0.94 (0.82-1.08), p=0.40                                              |
| <b><u>Falsification (Negative Control) Endpoints</u></b> |                             |                             |                                                                       |
| Hospitalization for Metabolic/Nutritional Disorder       | 1.15 (0.81-1.63), p=0.44    | 1.49 (0.94-2.36), p=0.09    | 1.51 (0.95-2.41), p=0.08                                              |
| Hospitalization for UTI                                  | 0.69 (0.43-1.13), p=0.14    | 0.80 (0.45-1.41), p=0.43    | 0.81 (0.46-1.43), p=0.47                                              |

\* Model reflects inverse probability of treatment weighting including 24 demographic and clinical variables and 6 index hospital variables.

† Model reflects inverse probability of treatment weighting and adjustment for discharge prescription for beta-blocker and mineralocorticoid receptor antagonist therapy.

Abbreviations: CI, confidence interval; HF, heart failure; HF<sub>r</sub>EF, heart failure with reduced ejection fraction; HR, hazard ratio; UTI, urinary tract infection

**Table S8. Unadjusted Cumulative Incidence of Clinical Outcomes For Patients Discharged with neither Sacubitril/Valsartan nor ACEI/ARB versus ACEI/ARB versus Sacubitril/Valsartan**

|                                                           | Neither<br>Sacubitril/Valsartan |                       |                                   |         |
|-----------------------------------------------------------|---------------------------------|-----------------------|-----------------------------------|---------|
|                                                           | nor ACEI/ARB<br>(n=4,822)       | ACEI/ARB<br>(n=7,857) | Sacubitril/Valsartan<br>(n=1,551) | p-value |
| <b><u>Effectiveness Endpoints</u></b>                     |                                 |                       |                                   |         |
| All-cause mortality                                       |                                 |                       |                                   |         |
| 30 days                                                   | 790 (16.4)                      | 428 (5.5)             | 75 (4.9)                          | < .001  |
| 12 months                                                 | 2501 (52.8)                     | 2369 (30.9)           | 444 (29.5)                        | < .001  |
| All-cause hospitalization                                 |                                 |                       |                                   |         |
| 30 days                                                   | 1422 (29.5)                     | 1704 (21.7)           | 356 (23.0)                        | < .001  |
| 12 months                                                 | 3114 (65.3)                     | 4835 (62.6)           | 984 (64.7)                        | < .001  |
| All-cause mortality or HF hospitalization                 |                                 |                       |                                   |         |
| 30 days                                                   | 1351 (28.1)                     | 1035 (13.2)           | 195 (12.6)                        | < .001  |
| 12 months                                                 | 3339 (70.2)                     | 3876 (50.4)           | 792 (52.3)                        | < .001  |
| HF hospitalization                                        |                                 |                       |                                   |         |
| 30 days                                                   | 655 (13.6)                      | 652 (8.3)             | 142 (9.2)                         | < .001  |
| 12 months                                                 | 1749 (36.8)                     | 2418 (31.4)           | 560 (37.0)                        | < .001  |
| <b><u>Falsification (Negative Control) Endpoints</u></b>  |                                 |                       |                                   |         |
| Metabolic/nutritional hospitalization<br>within 12 months | 92 (1.9)                        | 144 (1.9)             | 36 (2.4)                          | .42     |

|                                                             |          |           |          |     |
|-------------------------------------------------------------|----------|-----------|----------|-----|
| Urinary tract infection<br>hospitalization within 12 months | 83 (1.8) | 100 (1.3) | 17 (1.1) | .06 |
|-------------------------------------------------------------|----------|-----------|----------|-----|

---

Data presented as n (%). Cumulative incidence of mortality and mortality or HF hospitalization endpoints were calculated using the Kaplan-Meier method and group differences were evaluated using log-rank tests. Cumulative incidence for hospitalization outcomes was estimated using the cumulative incidence function to account for the competing risk of mortality, and group differences were evaluated using Gray tests.

Abbreviations: HF, heart failure



**Figure S1. Selection of the final study cohort.** \*For ineligible hospitalizations, n for each specific exclusion reflect sequential application of each criterion in the order displayed (e.g., ejection fraction criterion applied first).

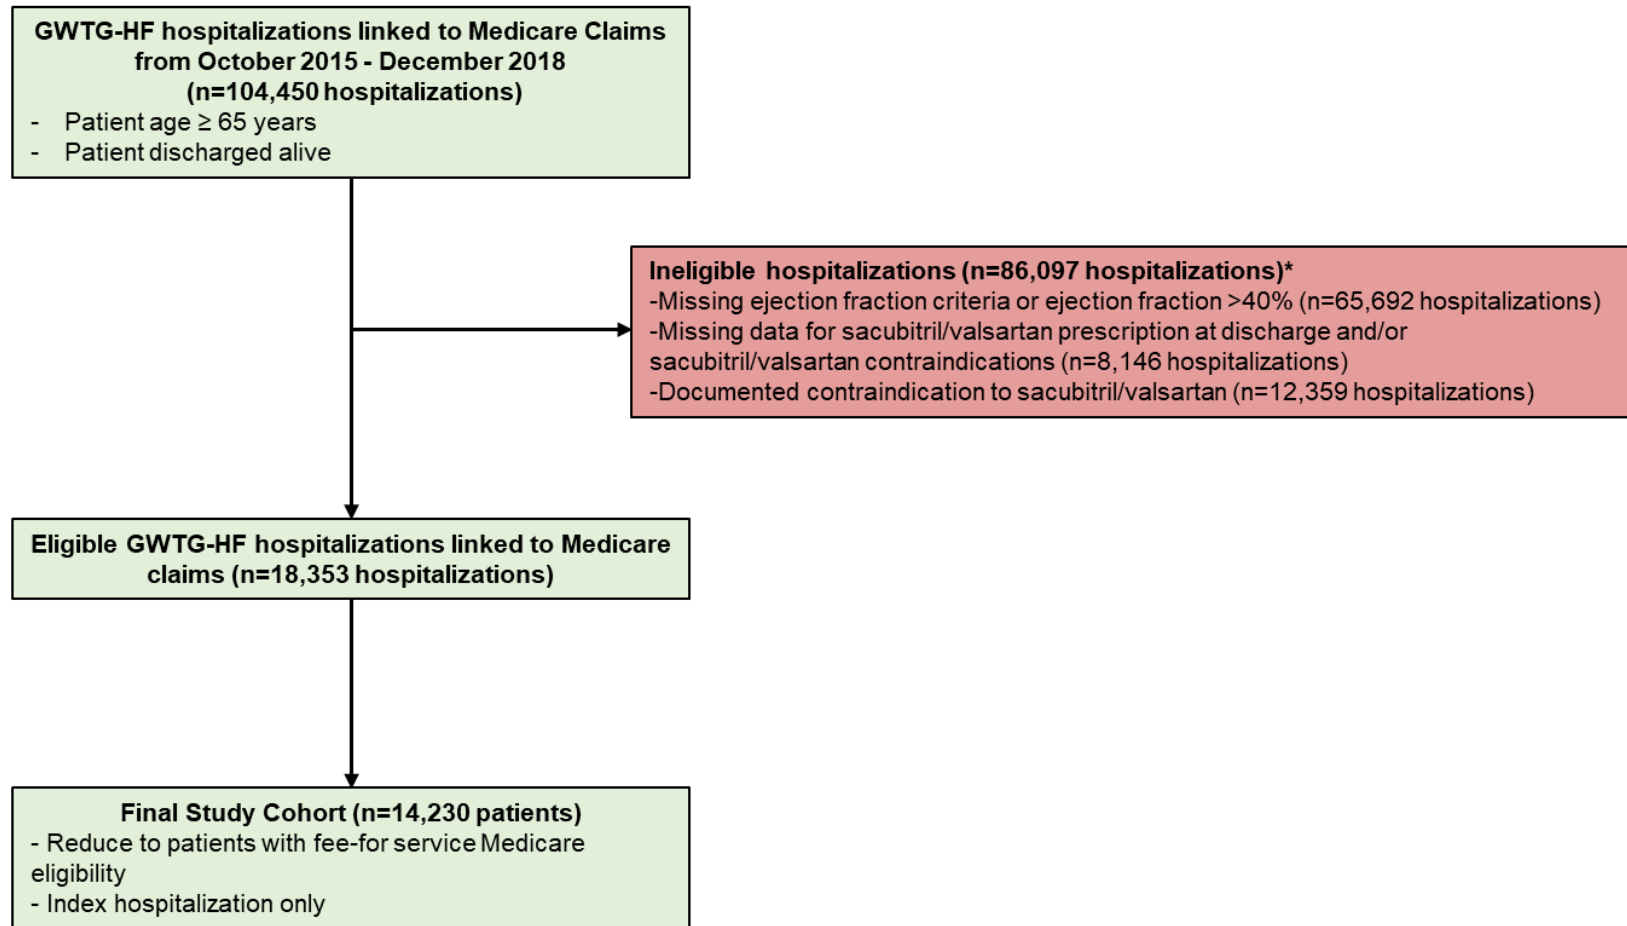

**Figure S2. Cumulative Incidence of Mortality and Hospitalization Outcomes for Patients Discharged with and without Sacubitril/Valsartan.** Curves reflect adjusted results in the form of directly-adjusted cumulative incidence curves, which were derived from inverse-probability-of-treatment-weighted proportional hazards models. Abbreviations: HF, heart failure

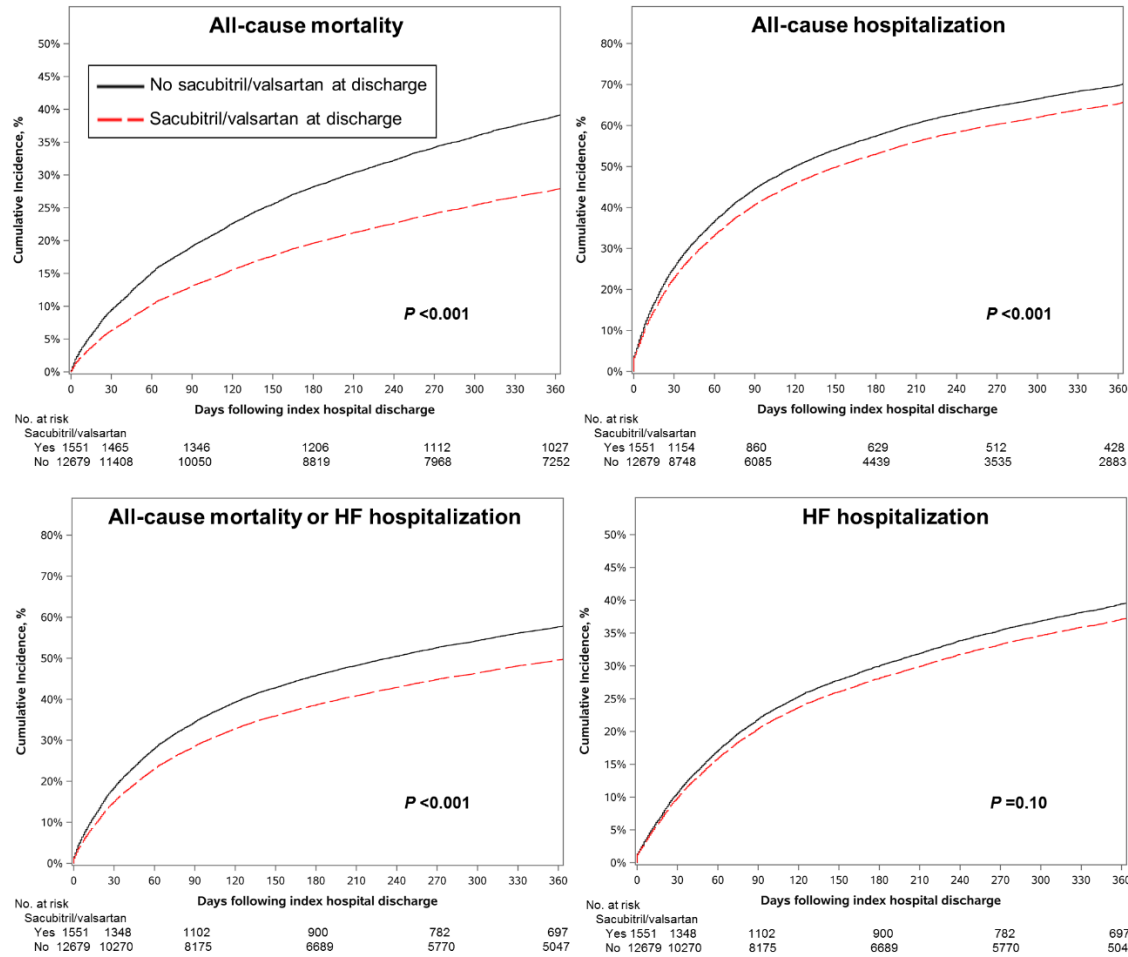

**Figure S3. Pre-specified Subgroup Analyses for Mortality and Hospitalization Outcomes for Patients Discharged With and Without Sacubitril/Valsartan.** Abbreviations: CI, confidence interval; HF, heart failure

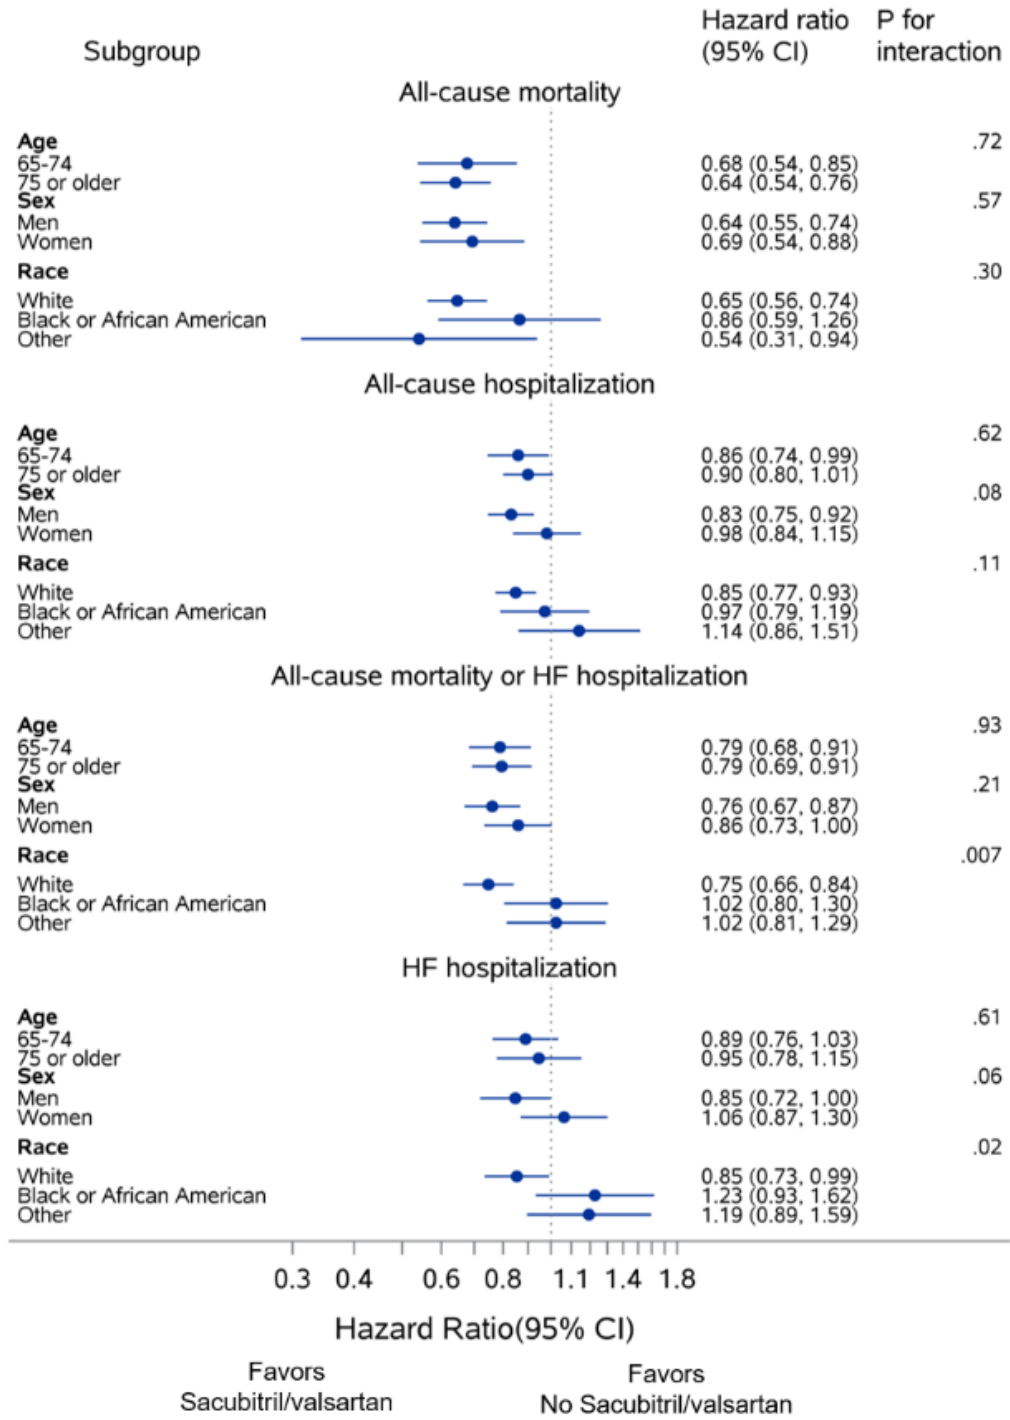

Supplement: JAH3-10-e021459-s001.pdf [file JAH3-10-e021459-s001.pdf]
